# Supplementary material for: Development and application of a simple capillary-microreactor for oxidation of glucose with a porous gold catalyst
Source: Royal Society of Chemistry journal article supplement (doi:10.1039/b414429e), 2004-12-01
Supplement: b414429e.doc [file b414429e.doc]

Development and application of a simple capillary-microreactor for oxidation of glucose with a porous gold catalyst

Chanbasha Basheera, Sindhu Swaminathanb, Hian Kee Leea* and Valiyaveettil Suresha,b

**Catalyst preparation**

Figure S1. Magnified SEM image (a) and the EDX spectrum (b) of the Au(0) sponge after removal of the seastar scaffold.

Calcium rich seastar skeleton was used as a template for preparing porous gold sponges and with a pore size of 10-20 micrometer. The technique involves coating the template with gold using e-beam evaporation (Univex 300 E-beam Evaporator). Approximately 300 nm thick gold coating was prepared over the scaffold followed by the removal of the scaffold by dissolving in 0.1 M HCl for a few a minutes to get pure Au(0) sponges. Morphological analysis using scanning electron microscopy showed the porous nature of the template (Fig. 1a, main text) and its gold replica (Fig. 1c or Fig. S1a). EDAX analysis was also done to confirm that the scaffold is removed completely (Figure S1b). These thin metallic sponges were used as a catalyst for the reported reactions.

**Bulk scale oxidation**

All the experiments were carried out at a pH 10 and ambient conditions by bubbling purified air through the slurry (20 Ncm3 min-1). The experiments were performed using a 718 STAT Titrino (Metroholm) instrument. An appropriate quantity of glucose and a few pieces of porous Au(0) catalyst (4 %) were mixed in distilled water. In order to monitor the progress of reaction, samples were withdrawn and analyzed using 13C-NMR and/or HPLC at various time intervals.

**Analysis of products**

The products were identified and quantified by comparing them with authentic standard samples. Both quantitative and qualitative analyses were performed by HPLC.

**HPLC analysis**

HPLC system consisted of Shimadzu (Tokyo, Japan) LC-6A pump, a Rheodyne (Cotati, CA, USA) 7010 injector equipped with a 10 L loop, a Waters 2410 R. I. detector and a Shimadzu C-R6A integrator. Separation was accomplished using a Partisil C18 column (100 mm X 4.6 mm i.d., 5-m particle size) (Whatman, Maidstone, UK). 0.01M H2SO4 (pH 2.1) in water at a flow rate of 0.2 ml/min was used as the mobile phase.

**NMR analysis**

13C-NMR spectra were recorded in D2O on a Bruker 300 MHz instrument. The assignment of peaks in the oxidation of glucose was made by comparing with standard spectrum of the reactant and product.

**Safety considerations**

Since the device works with 5 kV voltages, proper safety precautions must be taken when the high voltage is applied. Current values were continuously measured to ensure the electrical continuity of the fluidic channel.
